# Supplementary material for: PPAR-Gamma Activation May Inhibit the In Vivo Degeneration of Bioprosthetic Aortic and Aortic Valve Grafts under Diabetic Conditions
Source: MDPI journal article supplement (doi:10.3390/ijms222011081), 2021-10-14
Supplement: s1 [file s1]

**Table S1. Primers and respective sequences**

| <b>Table S1. A list of the used primers and respective sequences</b> |                               |                               |
|----------------------------------------------------------------------|-------------------------------|-------------------------------|
| <b>Gene</b>                                                          | <b>Forward primer (5'-3')</b> | <b>Reverse primer (5'-3')</b> |
| <b>TNF-alpha</b>                                                     | <b>GCTCCCTCTCATCAGTTCCA</b>   | <b>GCTTGGTGGTTTGCTACGAC</b>   |
| <b>IL-1b</b>                                                         | <b>AGGACCCAAGCACCTTCTTT</b>   | <b>CATCATCCCACGAGTCACAG</b>   |
| <b>IL-6</b>                                                          | <b>ACCACCCACAACAGACCAGT</b>   | <b>AGTGCATCATCGCTGTTTAT</b>   |
| <b>RAGE</b>                                                          | <b>TGAACTCACAGCCAATGTCC</b>   | <b>TCAGAGGTTTCCAAG</b>        |
| <b>BMP-2</b>                                                         | <b>GCTCAGCTTCCATCACGAA</b>    | <b>AAGAAGAAGCGTCGGGAAGT</b>   |
| <b>OCN</b>                                                           | <b>AAGCAGGAGGGCAGTAAGGT</b>   | <b>GTCCGCTAGCTCGTCACAAT</b>   |
| <b>OPN</b>                                                           | <b>AAGCCTGACCCATCTCAGAA</b>   | <b>ATGGCTTTCATTGGAGTTGC</b>   |
| <b>RUNX2</b>                                                         | <b>GATGACACTGCCACCTCTGA</b>   | <b>GATGAAATGCCTGGGAAGT</b>    |
| <b>ACTA2</b>                                                         | <b>GCTCTGGTGTGTGACAATGG</b>   | <b>CCCCACATAGCTGTCCTTTT</b>   |
| <b>OPG</b>                                                           | <b>GAGTGTGCGAATGTGAGGAA</b>   | <b>CACCTGAGAAGAACCCATCC</b>   |
| <b>MMP2</b>                                                          | <b>AGAAGGCTGTGTTCTTCGCA</b>   | <b>GGTCAGTGGCTTGGGGTATC</b>   |
| <b>MMP9</b>                                                          | <b>GCATCTGTATGGTCGTGGCT</b>   | <b>TGCAGTGGGACACATAGTGG</b>   |
| <b>MCP-1</b>                                                         | <b>CTGTAGCATCCACGTGCTGT</b>   | <b>GGTGCTGAAGTCCTTAGGGT</b>   |
| <b>NFkB</b>                                                          | <b>CCACTGTCAACAGATGGCCC</b>   | <b>GCACACGTAGCGGAATCGAA</b>   |

TNF-alpha, tumor necrosis factor-alpha; IL-1b, interleukin-1b; IL-6, interleukin-6; RAGE, receptor for advanced glycation end-products; BMP-2, bone morphogenetic protein-2; OCN, osteocalcin; OPN, osteopontin; RUNX2, runt-related transcription factor 2; ACTA2, actin alpha 2; OPG, osteoprotegerin; MMP2, matrix metalloproteinase 2; MMP9, matrix metalloproteinase 9; MCP-1, monocyte chemoattractant protein 1; NFkB, nuclear factor kappa-light-chain-enhancer of activated B cells
