# Supplementary material for: PPAR-Gamma Activation May Inhibit the In Vivo Degeneration of Bioprosthetic Aortic and Aortic Valve Grafts under Diabetic Conditions
Source: Int J Mol Sci. 2021 Oct 14;22(20):11081. doi: 10.3390/ijms222011081 (PMC8538504; doi:10.3390/ijms222011081)
Supplement: Supplementary file 1 [file ijms-22-11081-s001.zip]

Archive with 8 entries (8 files):
- Fig S1.png
- Fig S2.png
- Fig S3.png
- Fig S4 + caption.pdf
- Fig S4.tif
- Fig S5.png
- Supplemental data_methods.pdf
- Table S1_revised.pdf
